# Supplementary material for: Is the undergraduate microbiology curriculum preparing students for careers in their field?: an assessment of biology majors’ conceptions of growth and control of microorganisms
Source: PubMed Central journal article supplement (PMC6310449; doi:10.1186/s40594-018-0138-z), 2018-10-19
Supplement: 40594_2018_138_MOESM3_ESM.pdf [file 40594_2018_138_MOESM3_ESM.pdf]

| Questions |                                                                                                                 | Researcher 1 | Researcher 2 | Researcher 3 | Expert 1 | Expert 2 |
|-----------|-----------------------------------------------------------------------------------------------------------------|--------------|--------------|--------------|----------|----------|
| Theory    |                                                                                                                 |              |              |              |          |          |
| 1         | _____ is the size of millipore filters.                                                                         | R            | R            | R            | R        | R        |
| 2         | Define – Sterilization                                                                                          | R            | R            | R            | R        | R        |
| 3         | The time required to kill 90% of the microorganisms or spores in a sample under specified conditions is _____.  | R            | R            | R            | R        | R        |
| 4         | Give two examples of biological indicators to check autoclave efficiency.                                       | R            | R            | R            | R        | U        |
| 5         | Define – Bactericidal.                                                                                          | R            | R            | R            | R        | R        |
| 6         | Explain in brief how aldehydes and halogens control microbial growth                                            | U            | U            | U            | U        | U        |
| 7         | _____ is defined as reduction of the microbial population to levels considered safe by public health standards. | R            | R            | R            | R        | R        |
| 8         | Explain how filtration and radiation controls microorganisms.                                                   | R/U          | U            | U            | U        | U        |
| 9         | The pore size of a HEPA filter is _____.                                                                        | R            | R            | R            | R        | R        |
| 10        | Justify that there are many factors which affect activity of antimicrobial agent.                               | U            | U            | U            | U        | E        |
| 11        | Aqueous solution of formaldehyde is _____.                                                                      | R            | R            | R            | R        | R        |
| 12        | What are the different physical sterilisation methods?                                                          | R            | R            | R            | R        | R        |
| 13        | _____ % solution of gluteraldehyde has a wide spectrum of activity.                                             | R            | R            | R            | R        | R        |
| 14        | What should be the properties of an ideal disinfectant?                                                         | U            | U            | U            | U        | R        |
| 15        | Explain the construction and working of an autoclave.                                                           | R/U          | U            | U            | U        | U        |

|    |                                                                                                                                                |     |   |   |   |     |
|----|------------------------------------------------------------------------------------------------------------------------------------------------|-----|---|---|---|-----|
| 16 | Give two examples of filters used in sterilisation.                                                                                            | R   | R | R | R | U   |
| 17 | Write short note on use of wet heat to control microorganims.                                                                                  | R   | R | R | U | CR  |
| 18 | Define: Dye.                                                                                                                                   | R   | R | R | R | R   |
| 19 | State whether True or False: Inspissator is used to sterilize media containing egg.                                                            | U   | R | R | R | R   |
| 20 | Give the significance of Phenol Co-efficient.                                                                                                  | R   | R | R | U | R/U |
| 21 | Give two examples of Phenolic compounds.                                                                                                       | R   | R | R | R | U   |
| 22 | State whether True or False: A bactericide kills all microorganisms.                                                                           | R/U | R | R | U | R   |
| 23 | Discuss the construction and working of an autoclave.                                                                                          | R/U | U | U | U | U   |
| 24 | Write a short note on Ionising radiation and their use in sterilisation.                                                                       | R/U | R | R | R | CR  |
| 25 | Explain the mode of action and practical applications of the following chemical antimicrobial agents: Heavy metals and compounds and alcohols. | U   | U | U | U | U   |
| 26 | Give two examples of alcohols used as sterilants.                                                                                              | R   | R | R | R | U   |
| 27 | Give one example for bacteriological filter.                                                                                                   | R   | R | R | R | U   |
| 28 | Give two examples of gaseous disinfectant.                                                                                                     | R   | R | R | R | U   |
| 29 | Briefly describe how Quarternary ammonium compounds are used as bactericidal agents.                                                           | U   | U | U | U | U   |
| 30 | Give the importance of hot air oven.                                                                                                           | R   | R | R | R | R/U |
| 31 | Give two examples of types of radiation.                                                                                                       | R   | R | R | R | U   |
| 32 | Give two examples of antiseptic liquids.                                                                                                       | R   | R | R | R | U   |

| <b>Laboratory</b> |                                                                                                                                                                               | Researcher 1 | Researcher 2 | Researcher 3 | Expert 1 | Expert 2        |
|-------------------|-------------------------------------------------------------------------------------------------------------------------------------------------------------------------------|--------------|--------------|--------------|----------|-----------------|
| 33                | How are dry powders sterilised?                                                                                                                                               | R/U          | R            | R            | R        | R               |
| 34                | Provided to you is a culture suspension. Comment on the growth pattern of this organism in liquid media after 24 Hr incubation?                                               | AN           | AN           | AN           | AN       | AN/E            |
| 35                | Give principle of tyndallization.                                                                                                                                             | R            | R            | R            | R        | R               |
| 36                | Using suitable technique determine the oligodynamic action of copper on the provided pathogenic Gram positive organism.                                                       | AP/E         | AP           | AP           | AP       | AP              |
| 37                | Provided to you is a culture suspension. Use a simple lab technique which will preserve the culture using agar medium.                                                        | AP           | AP           | AP           | AP       | AP/AN           |
| 38                | Give role of Class III cabinets.                                                                                                                                              | R            | R            | R            | R        | R/U             |
| 39                | A Gram positive skin pathogen has been provided to you. Study the effect of two chemotherapeutic drugs on the culture and comment on your results.                            | AP/AN        | AP/AN        | AP/AN        | AN       | AP/AN           |
| 40                | Using suitable technique determine the action of heavy metals on the provided pathogenic Gram positive organism.                                                              | AP           | AP           | AP           | AP       | AP              |
| 41                | How are bandages sterilised?                                                                                                                                                  | R/U          | U            | U            | U        | R               |
| 42                | Provided to you are two dyes. Their role as inhibitory agent against Gram positive organism has to be ascertain. Use a suitable agar plate technique and report your findings | AP           | AP           | AP           | AP       | AP/AN/E/<br>C R |
| 43                | Give one example of a lab disinfectant.                                                                                                                                       | R            | R            | R            | R        | U               |

| Questions developed by the researchers |                                                                                                                                                                                                                                                                                                                                                  | Researcher 1 | Researcher 2 | Researcher 3 | Expert 1 | Expert 2 |
|----------------------------------------|--------------------------------------------------------------------------------------------------------------------------------------------------------------------------------------------------------------------------------------------------------------------------------------------------------------------------------------------------|--------------|--------------|--------------|----------|----------|
| 44                                     | A researcher needs to sterilize the following items: (a) A solution of vitamins, (b) contaminated hospital linen (c) petri dishes. Which method(s) will you suggest for each? Give reasons for the method(s) you have chosen.                                                                                                                    | U            | U            | U            | U        | U/E      |
| 45                                     | Give your comments on the following: A doctor has just finished removing a patient's infected kidney and is hurriedly moving to treat another patient who has suffered from burns. So he quickly wipes all his instruments with a cotton swab dipped in phenol and proceeds to wash them with soap water, then treats the patient who has burns. | E            | E            | E            | E        | E        |
| 46                                     | A food preparer did not wash his hands and probably introduced 50 <i>E.coli</i> cells in the dish. <i>E.coli</i> doubles every 20 minutes and the dish has been kept outside for about 4 hours. If 200 cells degrade 1 gram of the dish, determine how many grams of the dish will be degraded at the end of 4 hours.                            | AP           | AP           | AP           | AP       | AP       |

Key:

R: Remember

U: Understand

E: Evaluate

CR: Create

AP: Apply

AN: Analyse

**Supp. Table 1** Categorisation of questions based on revised Bloom's taxonomy
